# Supplementary material
Source: PubMed Central journal article supplement (PMC4282571)
Supplement: embj0033-2606-sd14.pdf [file embj0033-2606-sd14.pdf]

**Figure S9**

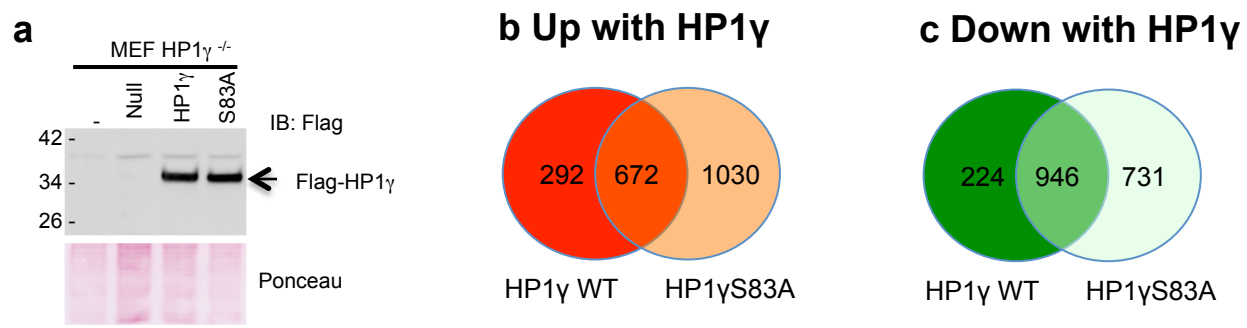

**d**

|              | NG-sequencing                        |       |          |                                        |       |          | RT-qPCR                              |       |          |                                        |       |          |
|--------------|--------------------------------------|-------|----------|----------------------------------------|-------|----------|--------------------------------------|-------|----------|----------------------------------------|-------|----------|
|              | HP1 $\gamma$ WT vs HP1 $\gamma$ null |       |          | HP1 $\gamma$ S83A vs HP1 $\gamma$ null |       |          | HP1 $\gamma$ WT vs HP1 $\gamma$ null |       |          | HP1 $\gamma$ S83A vs HP1 $\gamma$ null |       |          |
|              | Regulation                           | FC    | p-Val    | Regulation                             | FC    | p-Val    | Regulation                           | FC    | p-Val    | Regulation                             | FC    | p-Val    |
| <b>IFI44</b> | Down                                 | 21,24 | 3,11E-12 | Down                                   | 13,31 | 2,95E-11 | Down                                 | 23,02 | 9,51E-05 | Down                                   | 11,67 | 9,51E-05 |
| <b>IFIT3</b> | Down                                 | 7,1   | 1,77E-17 | Down                                   | 5,85  | 3,08E+14 | Down                                 | 7,08  | 1,53E-05 | Down                                   | 6,14  | 2,30E-05 |
| <b>OAS1b</b> | Down                                 | 9,12  | 5,32E-09 | Down                                   | 18,19 | 1,89E-12 | Down                                 | 7,96  | 1,28E-02 | Down                                   | 3,33  | 1,49E-02 |
| <b>LBP</b>   | Down                                 | 7,68  | 2,64E-21 | Down                                   | 14,39 | 5,84E-32 | Down                                 | 7,67  | 2,72E-06 | Down                                   | 12,10 | 1,84E-06 |
| <b>RPLP0</b> | Unchanged                            | 1,1   | 1,08E-01 | Unchanged                              | 1,14  | 1,15E-01 | Unchanged                            | 1,02  | 2,96E-01 | Unchanged                              | 0,99  | 4,35E-01 |
