# Supplementary material
Source: PubMed Central journal article supplement (PMC4282571)

**Figure S5**

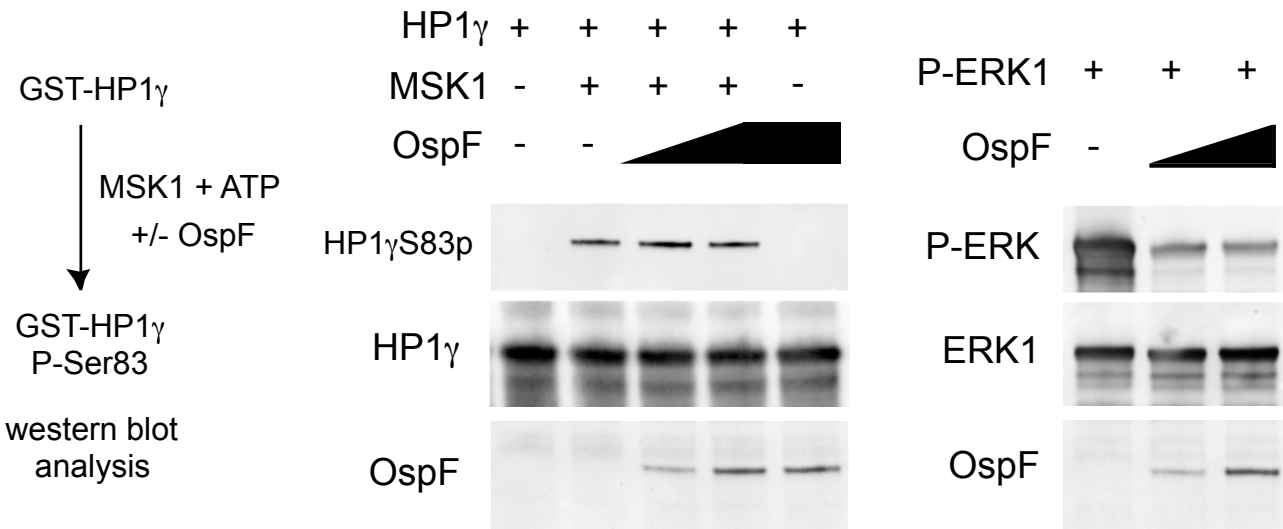

Supplement: embj0033-2606-sd10.pdf [file embj0033-2606-sd10.pdf]

**Figure S7**

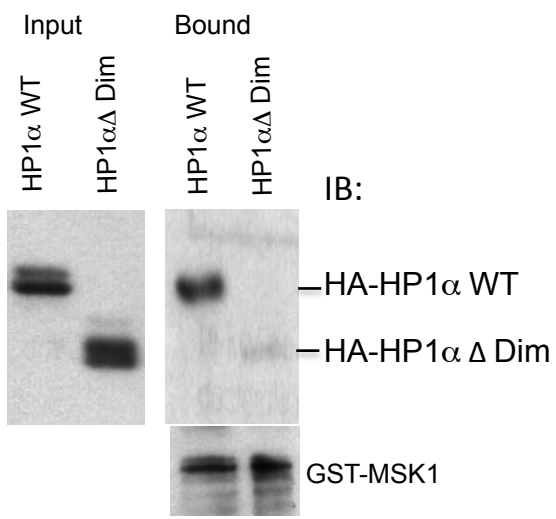

Supplement: embj0033-2606-sd12.pdf [file embj0033-2606-sd12.pdf]

**Fig 2a**

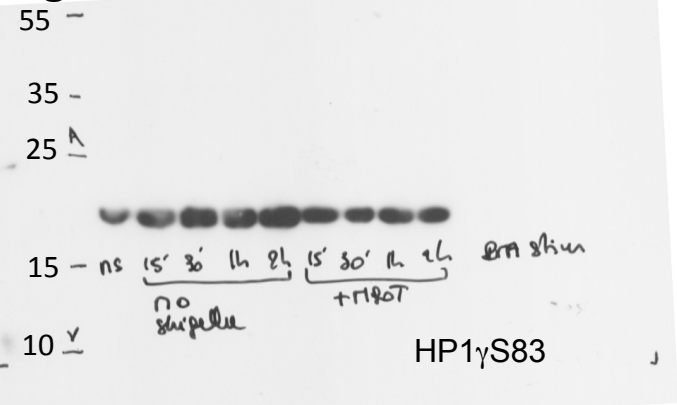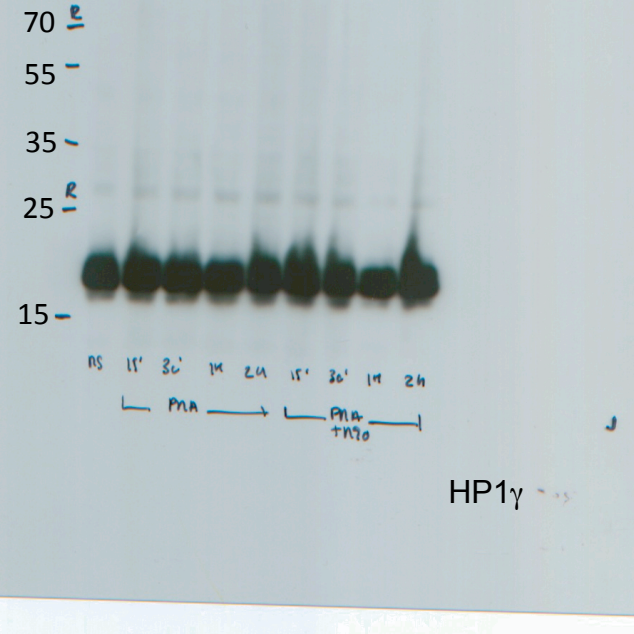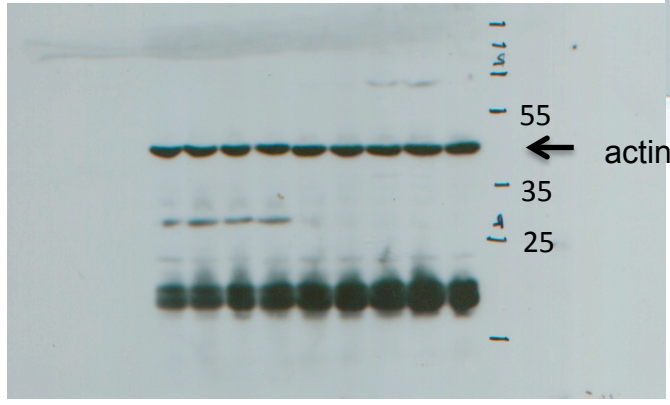

**Fig 2c**

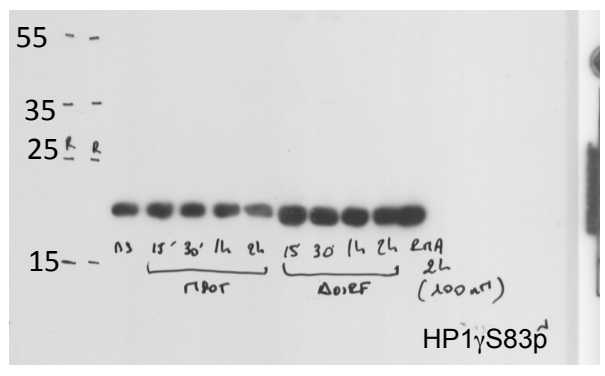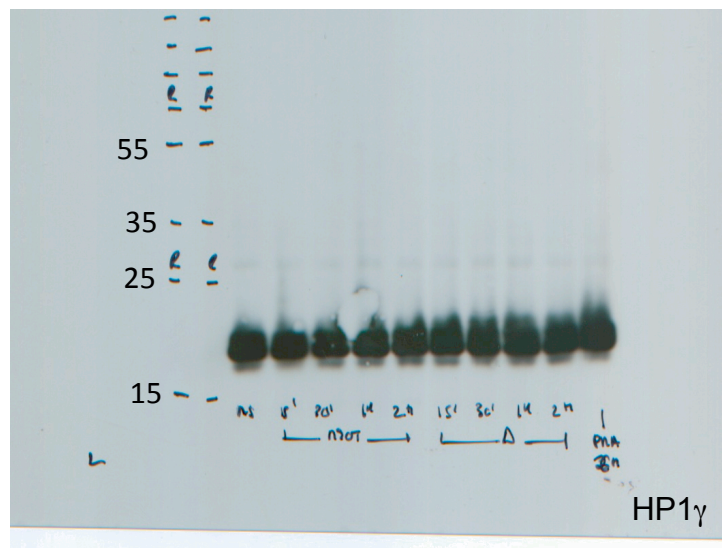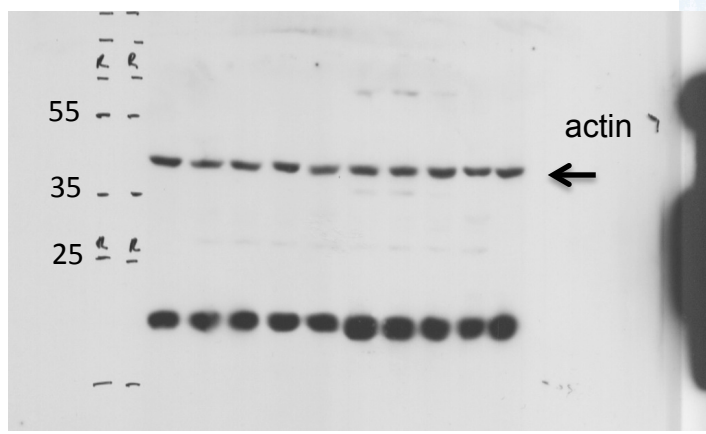

Fig 2b

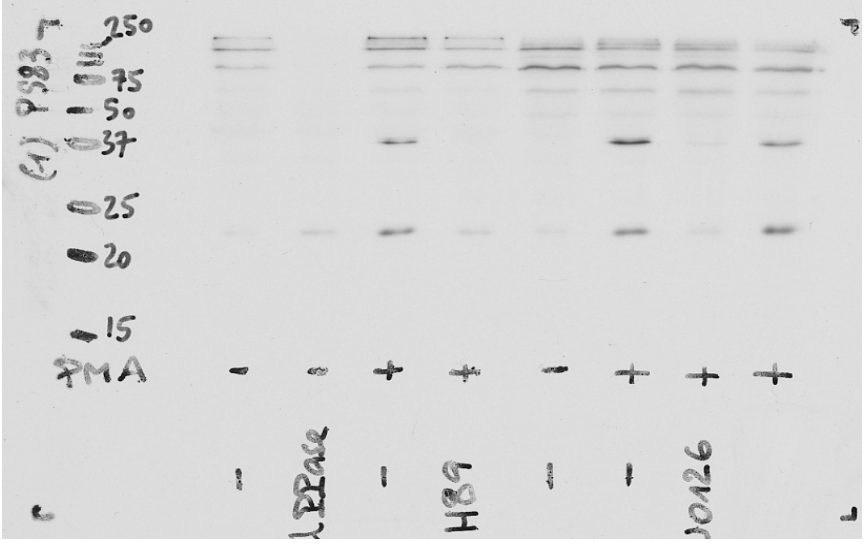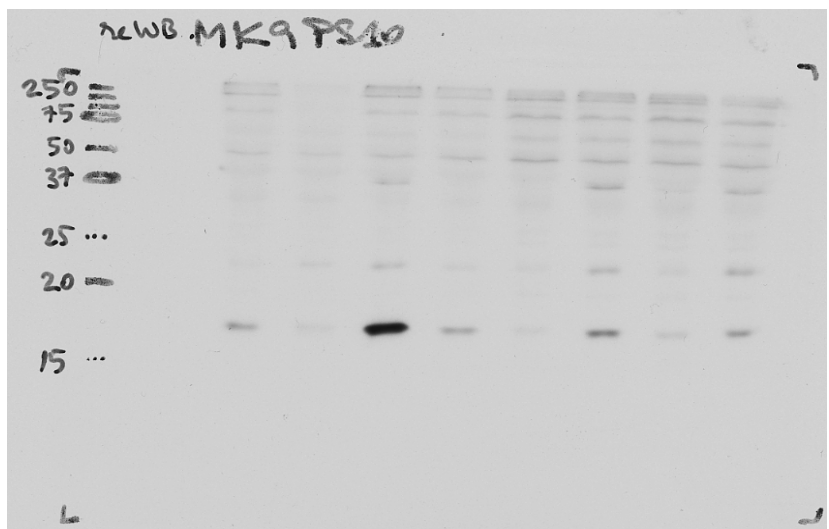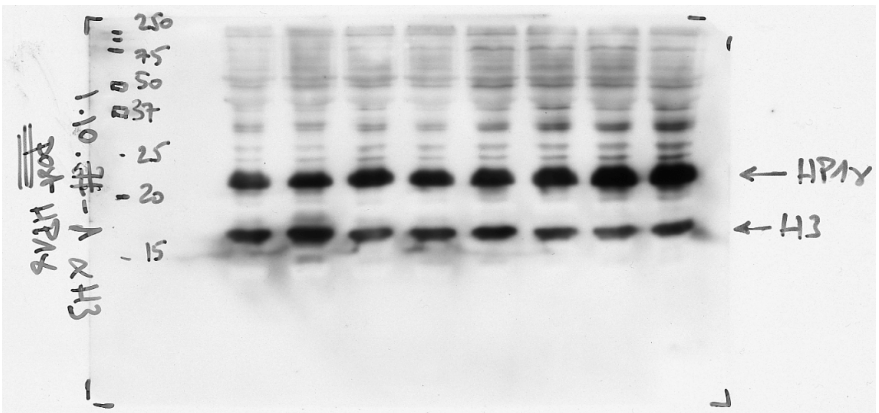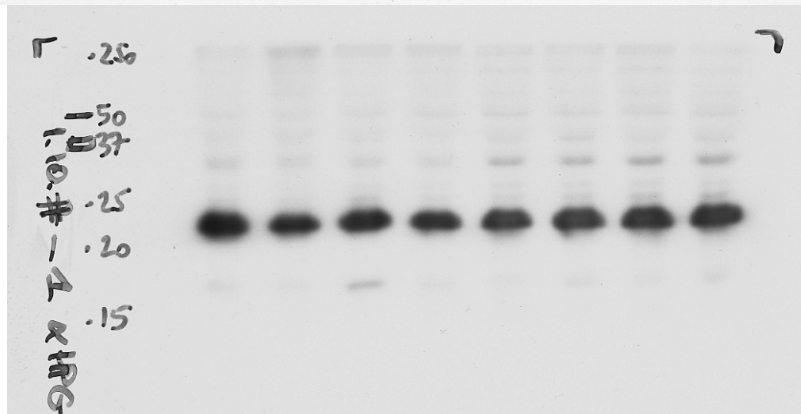

**Fig 2d**

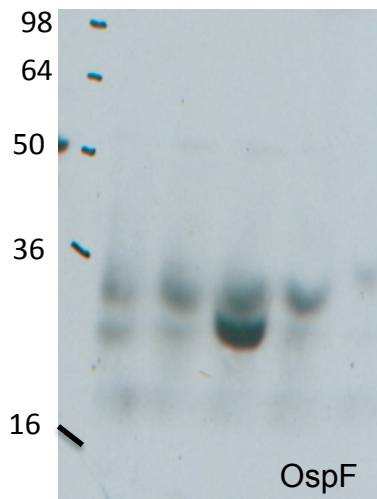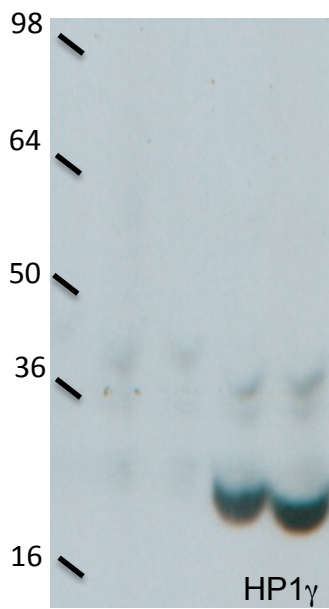

**Fig 2e**

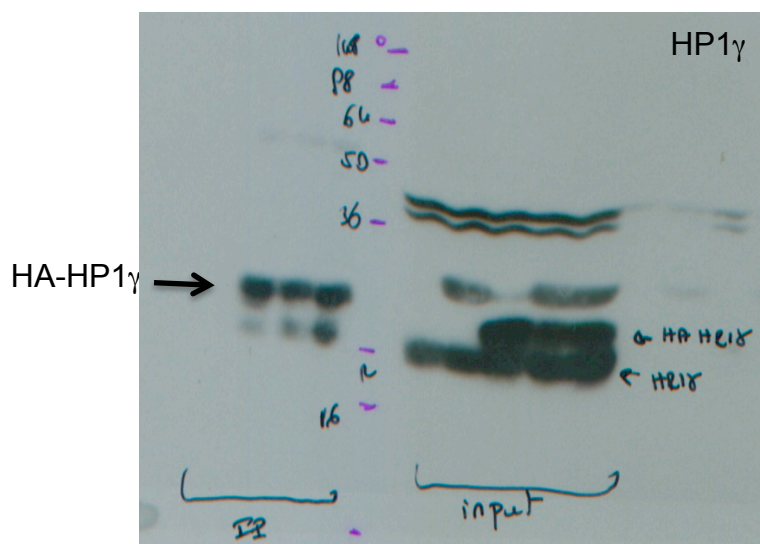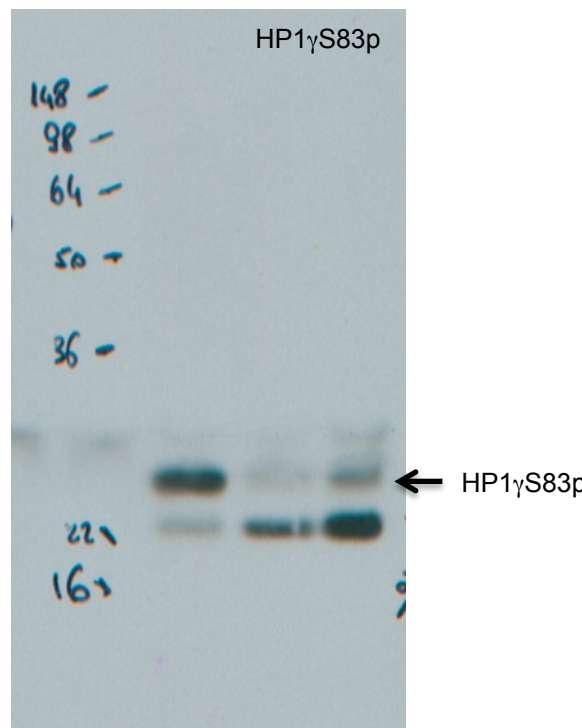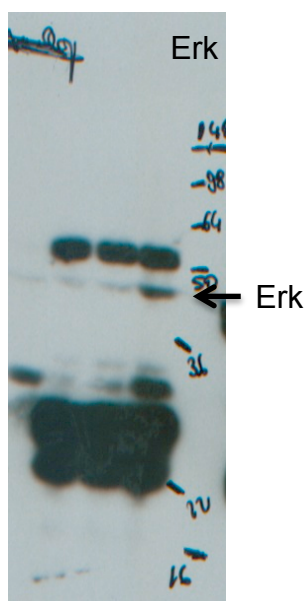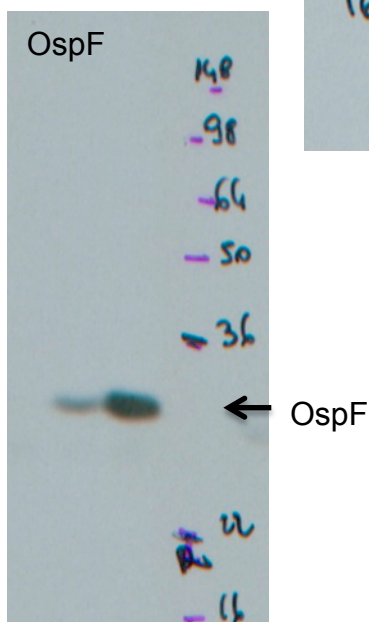

Supplement: embj0033-2606-sd2.pdf [file embj0033-2606-sd2.pdf]

**Fig 4b**

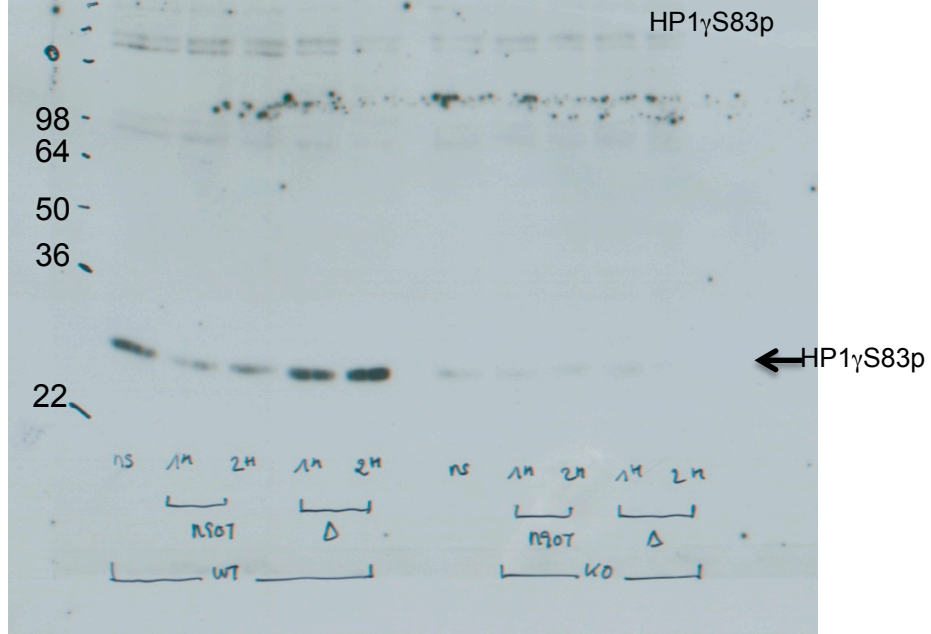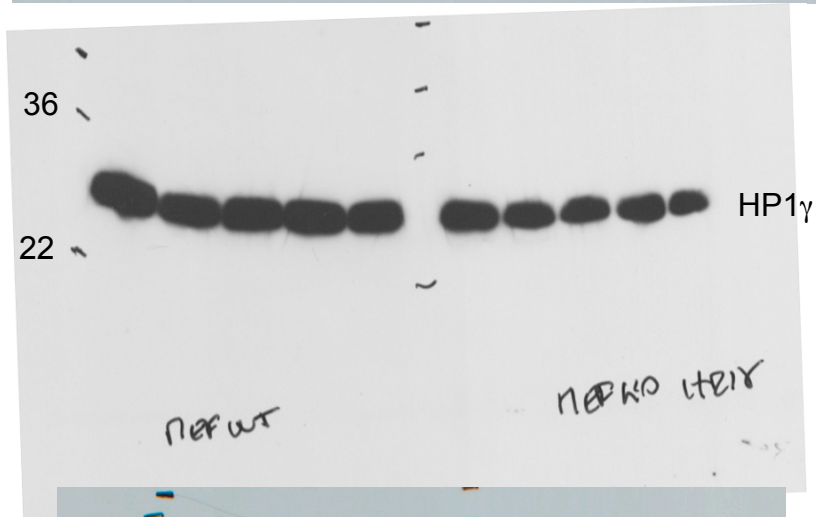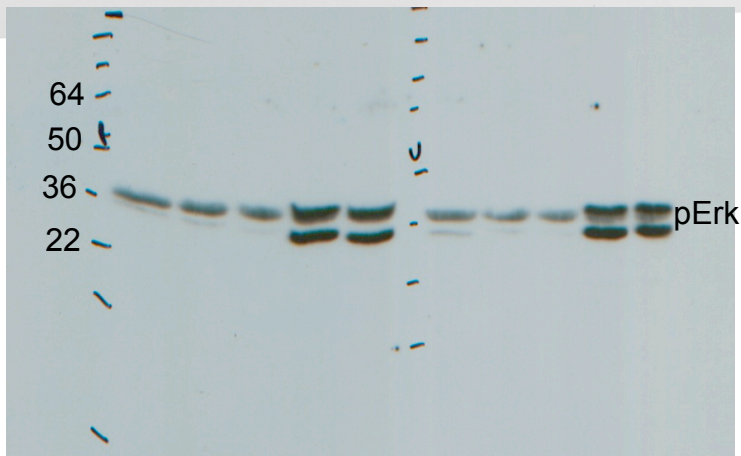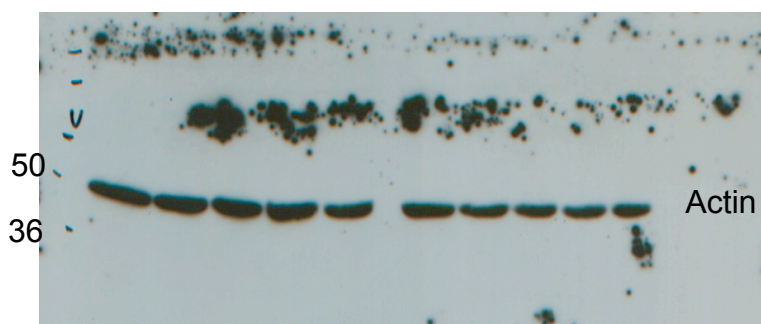

Fig 4d

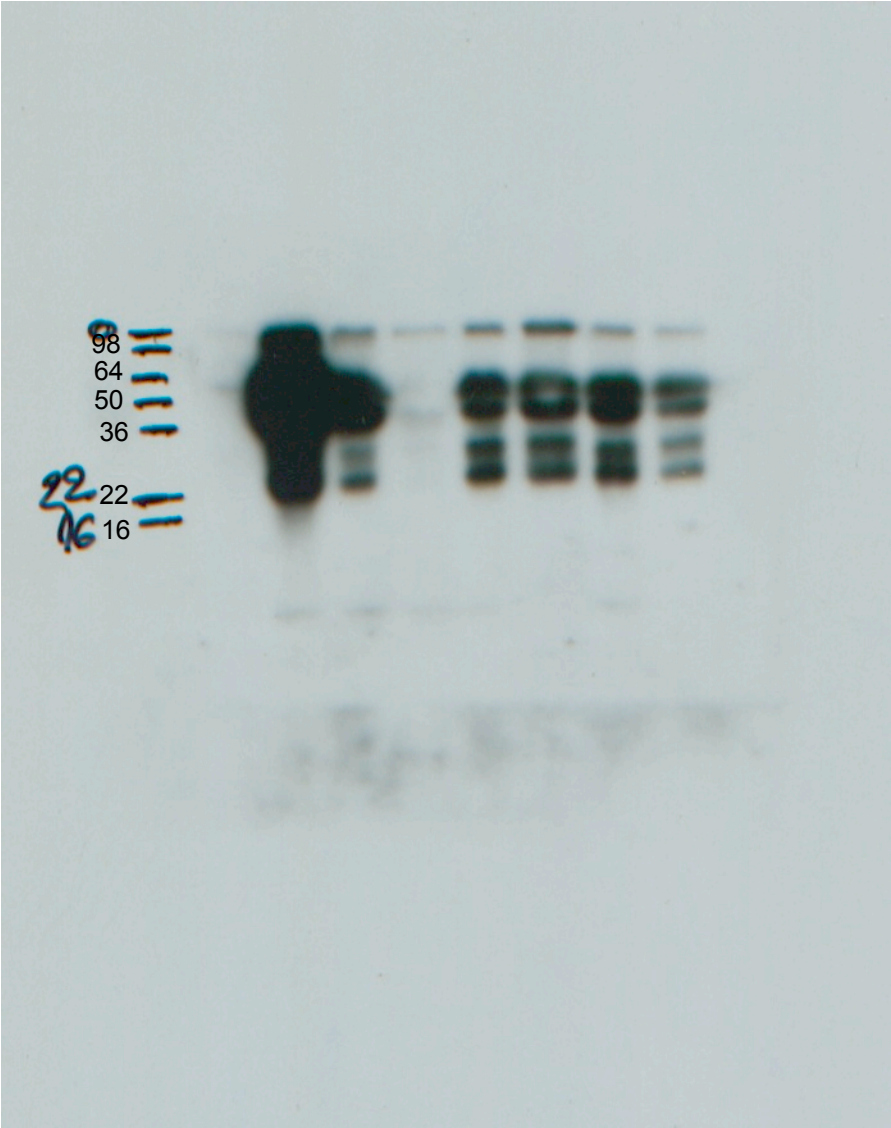

Supplement: embj0033-2606-sd3.pdf [file embj0033-2606-sd3.pdf]

Figure S1

GFP-bacteria

MPO

Merge with Dapi

PBS

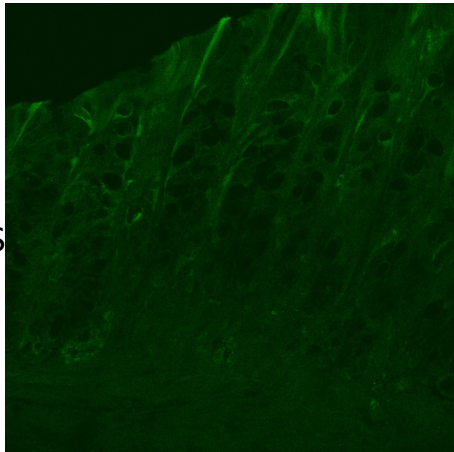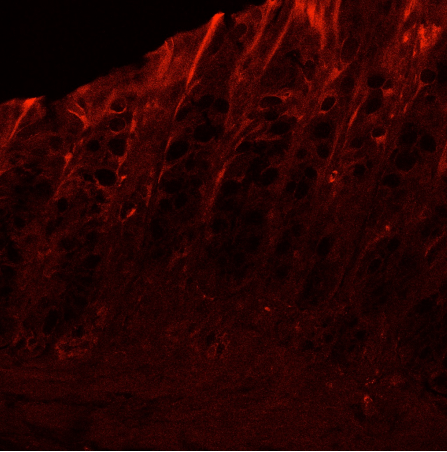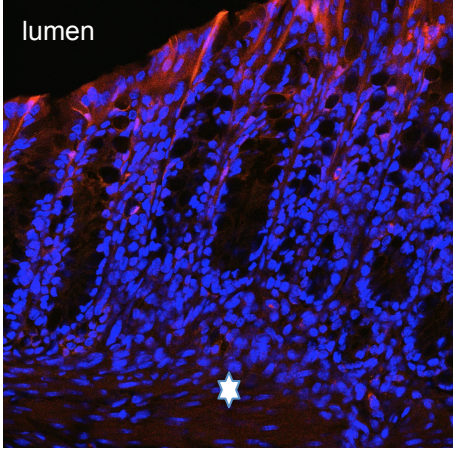

*mx1D*

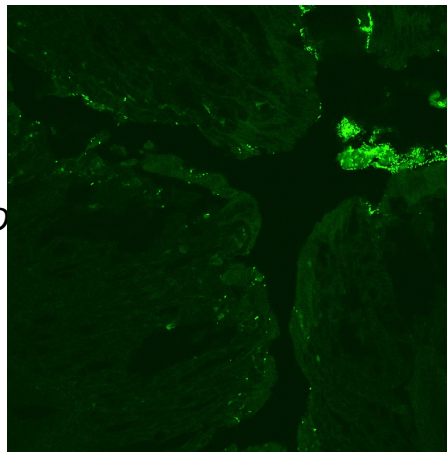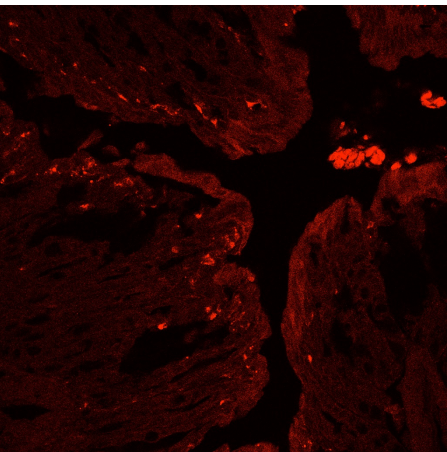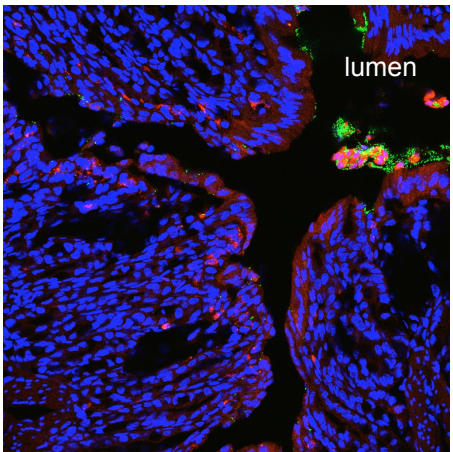

WT

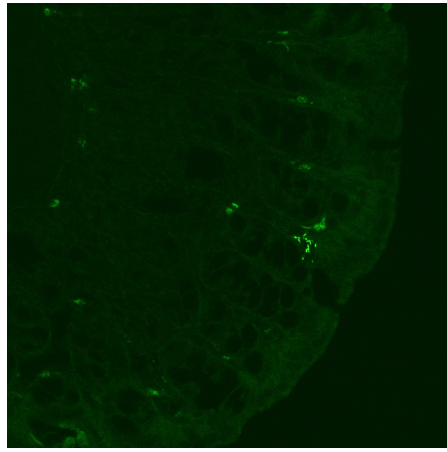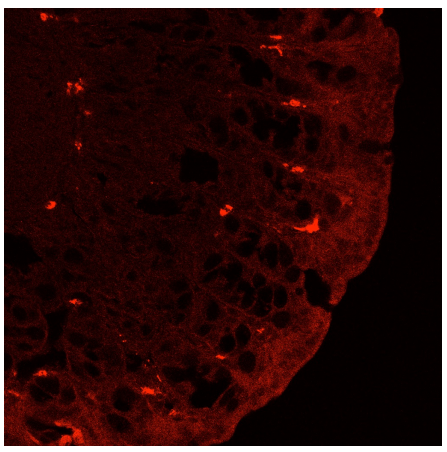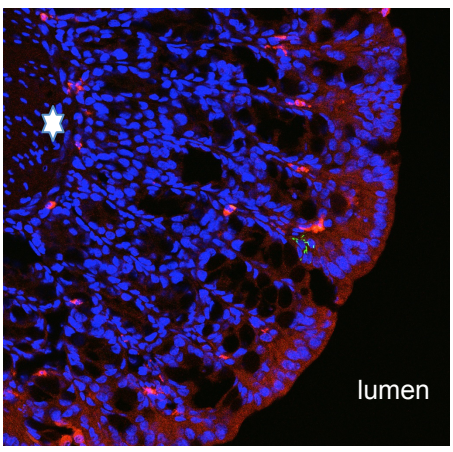

Supplement: embj0033-2606-sd6.pdf [file embj0033-2606-sd6.pdf]

**Figure S3**

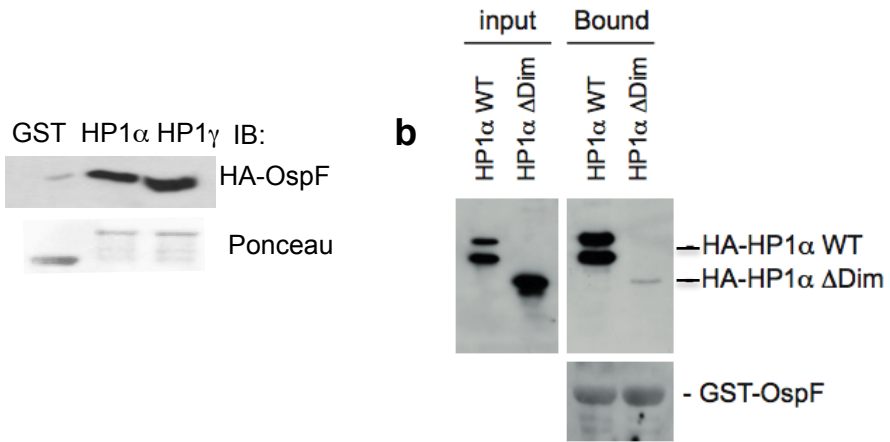

Supplement: embj0033-2606-sd8.pdf [file embj0033-2606-sd8.pdf]

Figure S4

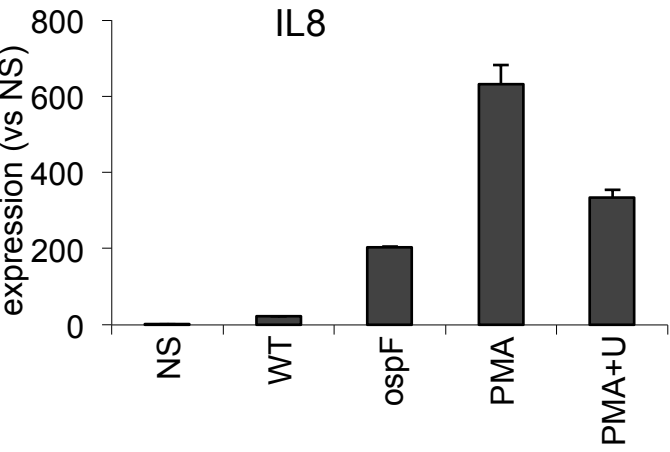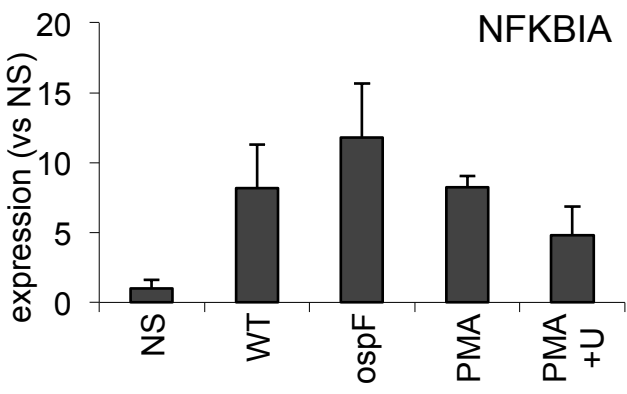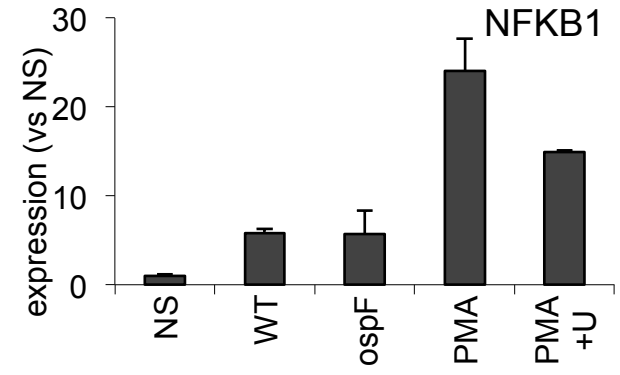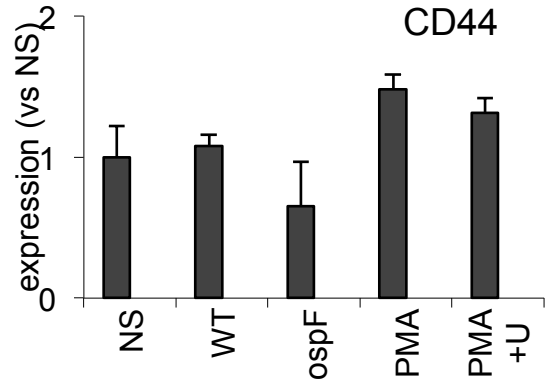

Supplement: embj0033-2606-sd9.pdf [file embj0033-2606-sd9.pdf]
